# Supplementary material for: Amphoteric starch derivatives as reusable flocculant for heavy-metal removal
Source: Royal Society of Chemistry journal article supplement (doi:10.1039/c7ra12798g), 2018-01-01
Supplement: c7ra12798g1.pdf [file c7ra12798g1.pdf]

1 *Supplementary Information*

2 **Amphoteric Starch Derivatives as Reusable Flocculant for Heavy-Metal**  
3 **Removal**

4 Liang Wu<sup>a</sup>, Long Chen<sup>a</sup>, Xingrong Zhang<sup>b</sup>, Huan Zhang<sup>a</sup>, Chengbi Li<sup>b</sup>, Yin Lv<sup>a</sup>,  
5 Tingting Wei<sup>a</sup>, Yisheng Xu<sup>a,c</sup>, Xin Jia<sup>a</sup>, Yulin Shi<sup>a\*</sup>, Xuhong Guo<sup>a,c\*</sup>

6

7 <sup>a</sup>Key Laboratory for Green Processing of Chemical Engineering of Xinjiang Bingtuan,  
8 School of Chemistry and Chemical Engineering, Shihezi University, Shihezi 832003, P.R.  
9 China.

10 <sup>b</sup>State Key Laboratory of Mineral Processing, Beijing 102628, China.

11 <sup>c</sup>State Key Laboratory of Chemical Engineering, East China University of Science and  
12 Technology, Shanghai 200237, China.

13 **Text S1.** The synthesis route of 2-chloro-4,6-diglycino-1,3,5-triazine (CDT)

14 Cyanuric chloride (3.68 g, 20 mmol) in acetone (40 mL) was added dropwise to  
15 an ice-cold mixture of Na<sub>2</sub>CO<sub>3</sub> (8.48 g, 80 mmol) and glycine (3.00 g, 40 mmol) in  
16 deionized water (60 mL) more than 30 min. The reaction mixture was stirred  
17 overnight at room temperature (RT). The reaction mixture was neutralized with  
18 concentrated HCl and filtered off. Then, the mixture washed three times with cold  
19 and deionized water and dried to get target product CDT(Khattab et al., 2016).

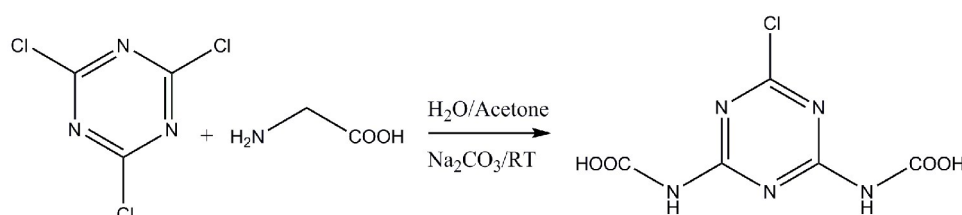

21

**Scheme 1S.** The synthesis route of CDT.

22 **Text S2.** Preparation of PRAS ( $DS = 0.23$ )

23 PRAS ( $DS = 0.23$ ) was prepared via an etherifying reaction between CDT and  
24 starch(ST) in dimethyl sulfoxide (DMSO). Typically, ST (0.028 mol, 4.9 g), solid sodium  
25 hydroxide (0.253 mol, 10.7 g), CDT (0.115 mol, 30.2 g), and DMSO were mixed in a  
26 four-necked flask under a  $N_2$  stream. The mixture was then heated to  $80\text{ }^\circ\text{C}$  and  
27 maintained at that temperature for 20 min. Thereafter, the mixture was stirred at  
28  $130\text{ }^\circ\text{C}$  for 10 h and then cooled to room temperature. Afterwards, three times the  
29 solution volume of methanol were added to the content of the flask, and the  
30 resulting precipitate was separated by filtration and then dried in a drying oven at  
31  $105\text{ }^\circ\text{C}$  for 10 h. The product was purified by dialysis molecular weight cut-off  
32 (MWCO) 7000 Da against distilled water for 96 h, followed by lyophilization.

33

34 **Text S3. Standard curve**

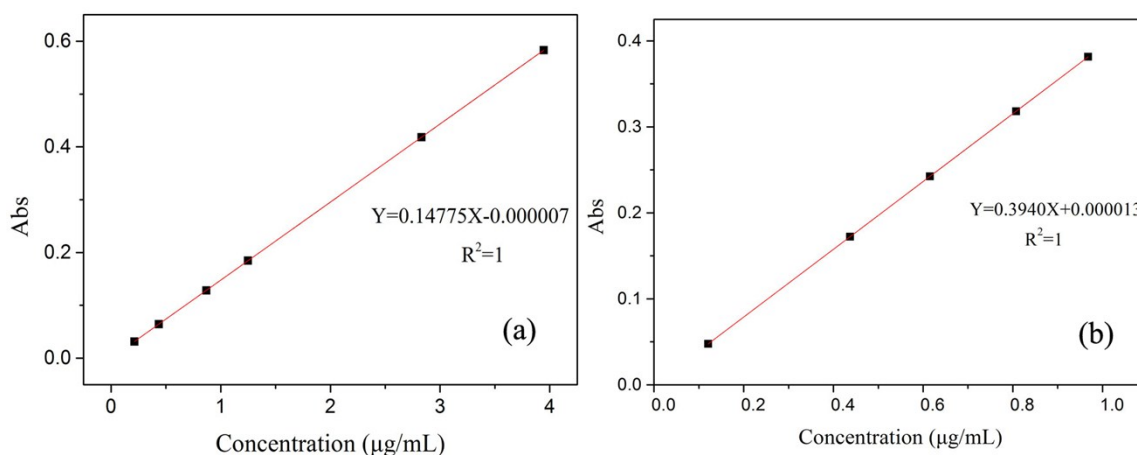

35

36

**Fig. S1.** Standard curve of Zinc (a) and Copper (b).

37 **References**

38 Khattab, S. N., Abdel Naim, S. E., El-Sayed, M., El Bardan, A. A., Elzoghby, A. O., Bekhit, A. A.,  
39 & El-Faham, A. (2016). Design and synthesis of new s-triazine polymers and their application  
40 as nanoparticulate drug delivery systems. *New Journal of Chemistry*, 40(11), 9565-9578.

41
